# Supplementary material for: Chemical profiling of seaweeds of the Arabian Gulf by liquid chromatography-mass spectrometry and in-silico screening against MPOX
Source: publisher site journal article supplement (doi:10.1515/bot-2024-0032), 2025-05-29
Supplement: Supplementary file 1 [file j_bot-2024-0032_suppl_001.docx]

**Supplementary Material**

Chemical profiling of seaweeds of the Arabian Gulf by liquid chromatography-mass spectrometry and *in-silico* screening against MPOX

Hanan Al-Adilah et al.

DOI 10.1515/bot-2024-0032

**Supplementary Table S1:** Putative annotation of metabolites of different seaweed extracts showing similarities with seaweed metabolites list generated in-house from ChemFinder database.

| **Seaweed** | **Rt (min)** | ***m/z*** | **Molecular formula [M]** | **Mass error (ppm)** | **mSigma** | **Score (%)** | **RDB** | **Molecular formula [M] in AntiBase** | **Exact mass** | **Mass difference (amu)** | **Compound identification in antibase** | **Similarity level** | **Activity** |
| --- | --- | --- | --- | --- | --- | --- | --- | --- | --- | --- | --- | --- | --- |
| **Data analysis software** | | | | | | | **AntiBase** | | | | |  |
| *Codium papillatum*  (Cpa) | 10.9 | 429.3724 | C29H49O2 | 0.6 | 19.4 | 100 | 5.5 | C29H48O2 | 429.3727 | **0.0003** | (1)(2)(3) | Genus | (3) against cancer  (Ahmad et al., 1993) |
| *Cladophora vagabunda*  (Cva | 10.9 | 429.3721 | C29H49O2 | 1.3 | 20.2 | 100 | 5.5 | C29H48O2 | 429.3727 | 0.0006 | (1)(2)(3)(4) | Phylum | (3) against cancer (He et al., 2010)  (4) cytotoxic activity (Shi et al., 2008) |
| *Sargassum*  *aquifolium*  (Saq) |  |  |  |  |  |  |  |  |  |  |  |  |  |
| *Sargassum asperifolium*  (Sas) | 10.9 | 429.3588 | C26H45N4O | -11.1 | 3.3 | 100 | 6.5 | C28H44O3 | 429.3363 | 0.0225 | (5) | Phylum | (5) active against P-388 leukaemia cells (IC50 0.6 μg/ml) and also exhibited anti-fungal properties. |
| *Sargassum ilicifolium* (Sil) | 3.9  10.9 | 289.1405  429.3719 | C13H17N6O2  C29H49O2 | -0.1  1.9 | 4.7  9.1 | 100  100 | 8.5  5.5 | C17H20O4  C29H48O2 | 289.1434  429.3727 | 0.0029  0.0008 | (6)(7)(8) | Phylum | (6) active against P-388 leukaemia cells (IC50 0.6 μg/ml) and also exhibited anti-fungal properties (Perry et al., 1991) |
| *Sargassum ilicifolium* var. *acaraeocarpum*  (Sia) |  |  |  |  |  |  |  |  |  |  |  |  |  |
| *Feldmannia indica* (Fin) |  |  |  |  |  |  |  |  |  |  |  |  |  |
| *Padina boergesenii*  (Pbo) |  |  |  |  |  |  |  |  |  |  |  |  |  |
| *Dictyota dichotoma*  (Ddi) |  |  |  |  |  |  |  |  |  |  |  |  |  |
| *Colpomenia sinuosa*  (Csi) | 10.9 | 429.3719 | C29H49O2 | 1.9 | 9.1 | 100 | 5.5 | C29H48O2 | 429.3727 | 0.0008 | (7)(8) | Phylum | (7)(8) exhibited cytotoxic activity against various cancer cell lines(Tang et al., 2002) |
| *Iyengaria stellata* (IS) | 6 | 303.2317 | C20H31O2 | 0.5 | 10.7 | 100 | 5.5 | C20H30O2 | 303.2318 | 0.0001 | (9)(10)(11) | Phylum |  |
| *Chondria sp.*  (Csp) |  |  |  |  |  |  |  |  |  |  |  |  |  |

**Supplementary Table S2:** 1H, 13C, COSY and HMBC NMR data of loliolide.

| **Position** | **δC** | **δH** | **COSY** | **HMBC** |
| --- | --- | --- | --- | --- |
| 1 | 35.1 | - |  |  |
| 2 | 49.3 | 1.33 m, 2.03 m | H-3 | C-1, C-3, C-6, C-11 |
| 3 | 63.9 | 4.11 m | H-3, H-4 | C-2 |
| 4 | 47.7 | 1.45 m, 2.50 m | H-3 | C-2, C-3, C-5, C-6 |
| 5 | 87.2 | - |  |  |
| 6 | 183.1 | - |  |  |
| 7 | 112.3 | 5.80 br s |  | C-1, C-5, C-6, C-8 |
| 8 | 173.5 | - |  |  |
| 9 | 24.7 | 1.60 s |  | C-4, C-5, C-6 |
| 10a | 24.5 | 1.33 s |  | C-1, C-2, C-6, C-11 |
| 11a | 29.4 | 1.30 s |  | C-1, C-2, C-6, C-10 |

**Supplementary Figure S1:** Chemical structures of compounds found in the present study in seaweeds from Kuwait according to the Antibase database. Note that stereochemical information represented in the individual structures has been taken “as is” from individual database entries and has not been confirmed for individual algal samples. Similarly, information about source organisms is provided “as is”.

12 loliolide

**Supplementary Figure S2:** MS/MS data for compounds 6, 9, 10 and 11.

MS/MS data for Compound 6: Mass peak found in *Sargassum ilicifolium* at 3.9 min along with a fragment which shows loss of two methoxy groups confirming the structure.


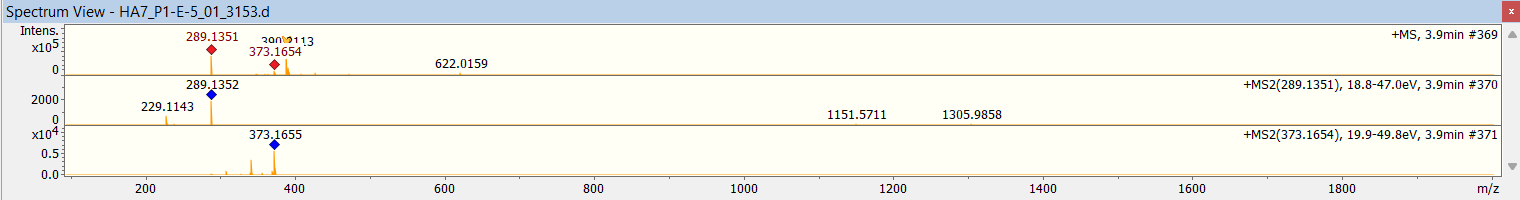


MS/MS data for Compound 9: Mass peak found in *Iyengaria stellata* at 8 min along with a fragment which shows loss of isopropyl group.


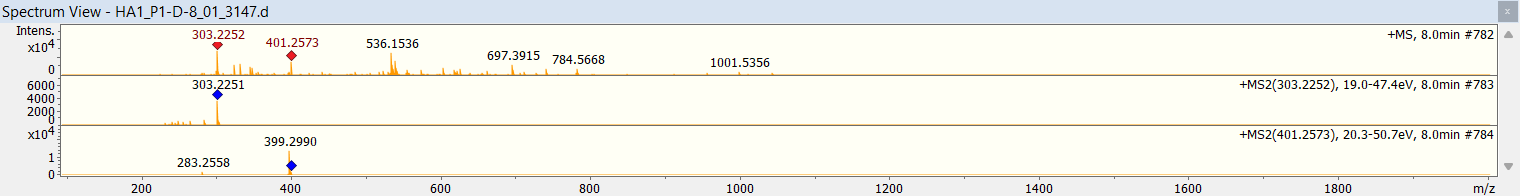


MS/MS data for Compound 10: Mass peak found in *Iyengaria stellata* at 6.9 min along with a mass that shows loss of the hydroxyl group.


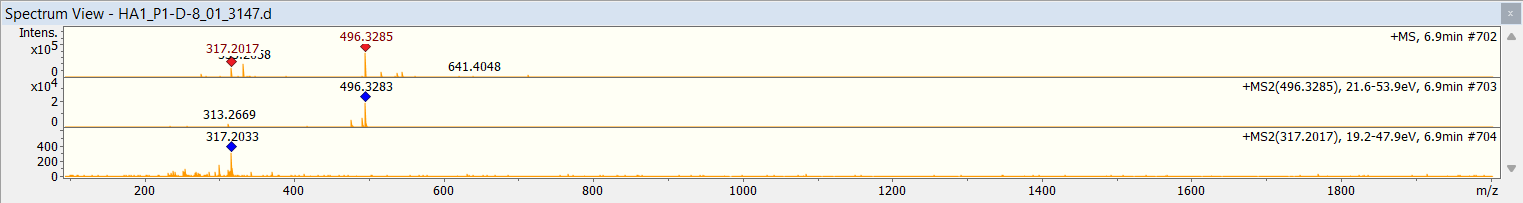


MS/MS data for Compound 11: mass peak found in *Iyengaria stellata* at 3.9 min along with mass that shows loss of the hydroxyl group.


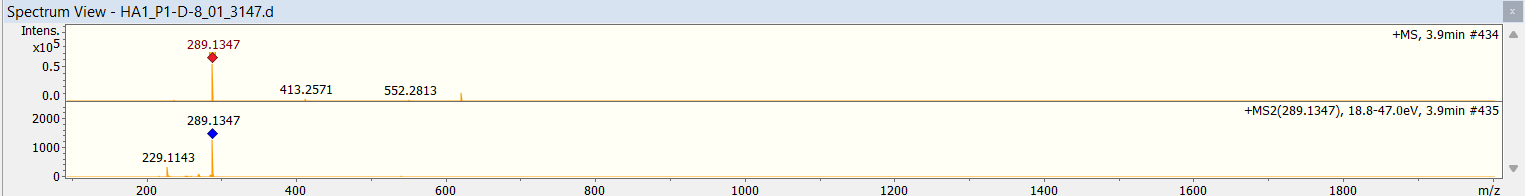


**Supplementary references**

Ahmad, V. U., Aliya, R., Perveen, S., and Shameel, M. (1993). Sterols from marine green alga Codium decorticatum. *Phytochemistry* *33*(5): 1189-1192.

He, Z., Zhang, A., Ding, L., Lei, X., Sun, J., and Zhang, L. (2010). Chemical composition of the green alga *Codium divaricatum* Holmes. *Fitoterapia* 81(8): 1125-1128.

Perry, N. B., Blunt, J. W., and Munro, M. H. (1991). A cytotoxic and antifungal 1, 4-naphthoquinone and related compounds from a New Zealand brown alga, *Landsburgia quercifolia*. *J. Nat. Prod.* 54(4): 978-985.

Shi, D., Fan, X., Sun, J., Han, L., and Shi, J. (2008). Steroids from green alga *Chaetomorpha basiretorsa* Setchell. *Chinese J*. *Ocean*. *Limnol*. 26(4): 415-418.

Tang, H. F., Yi, Y. H., Yao, X. S., Xu, Q. Z., Zhang, S.Y., and Lin, H.W. (2002). Bioactive steroids from the brown alga *Sargassum carpophyllum*. *J. Asian Nat. Prod. Res* 4(2): 95-101.
